# Supplementary material
Source: PubMed Central journal article supplement (PMC4793671)
Supplement: wark016656.ww1_default.pdf [file wark016656.ww1_default.pdf]

## **APPENDIX 1:** Lists of key-words and terms used to search the electronic databases

### **Ovid MEDLINE(R) In-Process & Other Non-Indexed Citations and Ovid MEDLINE(R)**

1. Clinical trial/
2. Randomized controlled trial/
3. Randomization/
4. Rct.tw.
5. random allocation.tw.
6. Randomly allocated.tw.
7. Allocated randomly.tw.
8. Randomized Controlled Trials as Topic/
9. randomized controlled trial/
10. Double Blind Method/
11. Single Blind Method/
12. clinical trial/
13. controlled clinical trial.pt.
14. randomized controlled trial.pt.
15. clinical trial.pt.
16. exp Clinical Trials as topic/
17. or/1-16
18. PLACEBOS/
19. placebo\$.tw.
20. sham.tw.
21. immitation.tw.
22. placebo effect\$.tw.
23. or/18-22
24. surgery.tw.
25. surgical.tw.
26. arthroscopy.tw.
27. endoscopy.tw.
28. transplantation.tw.
29. \$scopy.tw.
30. \$scopic.tw.
31. laparoscopy.tw.
32. Meta-Analysis as Topic/
33. meta analy\$.tw.
34. metaanaly\$.tw.
35. Review/
36. Comment/
37. Letter/
38. Editorial/
39. animal/
40. dose\$.tw.
41. pre\$medication.tw.
42. an\$esthesia.tw.
43. an\$esthetic\$.tw.
44. antibiotic\$.tw.
45. steroid\$.tw.
46. prophylaxis.tw.
47. prevention.tw.
48. preoperative.tw.
49. preanaesthetic\$.tw.
50. pre\$emptive.tw.
51. pre-operative.tw.
52. post-operative.tw.
53. postoperative.tw.
54. post\$surgery.tw.
55. (analgesic adj trial).tw.
56. oral\$.tw.
57. acupuncture.tw.
58. acupressure.tw.
59. scar.tw.
60. infection.tw.

61. dental.tw.
62. post\$surgical.tw.
63. pre\$surgical.tw.
64. case report.tw.
65. case study.tw.
66. pacing.tw.
67. stimulation.tw.
68. growth factor\$.tw.
69. hormon\$.tw.
70. or/24-31
71. or/32-69
72. 17 and 23
73. 72 and 70
74. 73 not 71

## **Ovid EMBASE**

1. Clinical trial/
2. Randomized controlled trial/
3. Randomization/
4. Single blind procedure/
5. Double blind procedure/
6. Crossover procedure/
7. Randomi?ed controlled trial\$.tw.
8. Rct.tw.
9. random allocation.tw.
10. Randomly allocated.tw.
11. Allocated randomly.tw.
12. (allocated adj2 random).tw.
13. Single blind\$.tw.
14. Single blind\$.tw.
15. or/1-14
16. Placebo\$.tw.
17. placebo effect\$.tw.
18. sham.tw.
19. placebo.tw.
20. or/16-19
21. surgery.tw.
22. surgical.tw.
23. arthroscopy.tw.
24. endoscopy.tw.
25. \$scopy.tw.
26. \$scopic.tw.
27. laparoscopy.tw.
28. transplantation.tw.
29. or/21-28
30. letter/
31. Review/
32. animal/
33. editorial/
34. ((meta adj analy\$) or metaanalys\$).tw.
35. (analgesic adj trial).tw.
36. meta\$analysis.tw.
37. dose\$.tw.
38. oral\$.tw.
39. orally.tw.
40. dental.tw.
41. pre\$medication.tw.
42. pre\$surgical.tw.
43. post\$surgical.tw.
44. pre\$surgery.tw.
45. post\$surgery.tw.
46. antibiotic\$.tw.
47. an\$esthetic\$.tw.
48. steroid\$.tw.
49. peri\$operative.tw.
50. pre\$emptive.tw.

51. pre\$an\$esthetic\$.tw.
52. post\$operative.tw.
53. prophylaxis.tw.
54. prevention.tw.
55. acupuncture.tw.
56. accupressure.tw.
57. scar\$.tw.
58. infection\$.tw.
59. acupressure.tw.
60. pre\$operative.tw.
61. growth factor\$.tw.
62. pacing.tw.
63. stimulation.tw.
64. hormon\$.tw.
65. case report\$.tw.
66. case study.tw.
67. or/30-66
68. 15 and 20
69. 68 and 29
70. 69 not 67

## **Cochrane Central Register of Controlled Trials**

[http://onlinelibrary.wiley.com/doi/cochrane/cochrane\\_clcentral\\_articles\\_fs.html](http://onlinelibrary.wiley.com/doi/cochrane/cochrane_clcentral_articles_fs.html)

(placebo OR placebo effect OR sham OR imitation):ti,ab,kw and (surgery OR surgical OR laparoscopy OR endoscopy OR arthroscopy OR transplantation OR scopy):ti,ab,kw and (clinical trial OR randomised clinical trial OR RCT OR randomised controlled trial OR randomisation ):ti,ab,kw not (drug OR dental OR oral OR infection OR steroids OR hormones OR growth factor OR prophylaxis OR anaesthesia OR pre-surgical OR post-surgical OR pre-emptive OR post-operative OR preoperative OR antibiotics OR acupuncture OR acupressure OR scar OR infection OR prevention):ti,ab,kw not (review OR animal OR stimulation):ti,ab,kw in Trials

## **ClinicalTrials.gov**

Key words: interventional studies AND placebo NOT drug, stimulation, stimulator, acupuncture, acupressure, biological, behavioural, dietary supplements, genetic, analgesic, preconditioning, bone marrow, stem cells, and hormones
